# Supplementary material for: The Newly Sequenced Genome of Pisum sativum Is Replete with Potential G-Quadruplex-Forming Sequences—Implications for Evolution and Biological Regulation
Source: MDPI journal article supplement (doi:10.3390/ijms23158482), 2022-07-30

Supplementary Material Table S1; G4Hunter results

| <b>Supplementary Material Table S1: Results;</b> (A) the DNA sequence; (B) the NCBI accession numbers for genomic sequences; (C), assigned tags corresponding to the generic name of analyzed organism; (D) count of every nucleotide; (E) the total length of genome; (F) GC count of genome; (G) gc content in %; (H) the total count of PQS found; (I) the PQS frequency per 1,000 nt; (J) the number of PQS per 1,000 GC; (K-O) the the total count of PQS with different G4hunter score 1.2-1.4 interval; (P-T), the total lenght of PQSs with different G4Hunter score interval; (U) the total lenght of all PQS found; (V) total length of PQS divided by genome length ; (W-AA) shows the frequency of PQS with different G4Hunter score interval; (AB-AH) the coverage of the sequence by PQS in different G4Hunter score intervals. For every column with numerical data, there is statistical analyses below results. |            |        |                                                                                |             |
|----------------------------------------------------------------------------------------------------------------------------------------------------------------------------------------------------------------------------------------------------------------------------------------------------------------------------------------------------------------------------------------------------------------------------------------------------------------------------------------------------------------------------------------------------------------------------------------------------------------------------------------------------------------------------------------------------------------------------------------------------------------------------------------------------------------------------------------------------------------------------------------------------------------------------------|------------|--------|--------------------------------------------------------------------------------|-------------|
| A                                                                                                                                                                                                                                                                                                                                                                                                                                                                                                                                                                                                                                                                                                                                                                                                                                                                                                                                | B          | C      | D                                                                              | E           |
| name                                                                                                                                                                                                                                                                                                                                                                                                                                                                                                                                                                                                                                                                                                                                                                                                                                                                                                                             | ncbi       | tags   | nucleic_count                                                                  | length [bp] |
| Chromosome_1LG6                                                                                                                                                                                                                                                                                                                                                                                                                                                                                                                                                                                                                                                                                                                                                                                                                                                                                                                  | LR535892.1 | ntDNA1 | {'T': 97427444, 'A': 97525019, 'G': 57822712, 'N': 61592043, 'C': 57797928}    | 372165146   |
| Chromosome_2LG1                                                                                                                                                                                                                                                                                                                                                                                                                                                                                                                                                                                                                                                                                                                                                                                                                                                                                                                  | LR535893.1 | ntDNA2 | {'T': 104462357, 'A': 104614492, 'G': 63459355, 'N': 91625082, 'C': 63436632}  | 427597918   |
| Chromosome_3LG5                                                                                                                                                                                                                                                                                                                                                                                                                                                                                                                                                                                                                                                                                                                                                                                                                                                                                                                  | LR535894.1 | ntDNA3 | {'T': 107542520, 'A': 107585623, 'G': 65045590, 'N': 92386042, 'C': 65001026}  | 437560801   |
| Chromosome_4LG4                                                                                                                                                                                                                                                                                                                                                                                                                                                                                                                                                                                                                                                                                                                                                                                                                                                                                                                  | LR535895.1 | ntDNA4 | {'T': 111470141, 'A': 111475147, 'G': 66656269, 'N': 89966344, 'C': 66782776}  | 446350677   |
| Chromosome_5LG3                                                                                                                                                                                                                                                                                                                                                                                                                                                                                                                                                                                                                                                                                                                                                                                                                                                                                                                  | LR535896.1 | ntDNA5 | {'T': 145534245, 'A': 145744379, 'G': 87333136, 'N': 113467812, 'C': 87189499} | 579269071   |
| Chromosome_6LG2                                                                                                                                                                                                                                                                                                                                                                                                                                                                                                                                                                                                                                                                                                                                                                                                                                                                                                                  | LR535897.1 | ntDNA6 | {'T': 119471705, 'A': 119510303, 'G': 71682987, 'N': 98221522, 'C': 71530532}  | 480417049   |
| Chromosome_7LG7                                                                                                                                                                                                                                                                                                                                                                                                                                                                                                                                                                                                                                                                                                                                                                                                                                                                                                                  | LR535898.1 | ntDNA7 | {'T': 122118968, 'A': 122335647, 'G': 73411942, 'N': 100127006, 'C': 73387399} | 491380962   |
| Mitochondrial DNA                                                                                                                                                                                                                                                                                                                                                                                                                                                                                                                                                                                                                                                                                                                                                                                                                                                                                                                | MW073102.1 | mtDNA  | {'A': 99980, 'G': 82270, 'C': 81732, 'T': 99861}                               | 363843      |
| Chloroplast DNA                                                                                                                                                                                                                                                                                                                                                                                                                                                                                                                                                                                                                                                                                                                                                                                                                                                                                                                  | MG882488   | cpDNA  | {'G': 20732, 'A': 39077, 'C': 21716, 'T': 40510}                               | 122035      |

| STATISTICS |  |  |  |                   |
|------------|--|--|--|-------------------|
| SUM        |  |  |  | 3235227502        |
| CNT        |  |  |  | 9                 |
| AVG        |  |  |  | 359469722         |
| MIN        |  |  |  | 122035            |
| MAX        |  |  |  | 579269071         |
| VAR        |  |  |  | 39653057699341000 |
| STDEV      |  |  |  | 211210061         |
| Q1         |  |  |  | 372165146         |
| MEDIAN Q2  |  |  |  | 437560801         |
| Q3         |  |  |  | 480417049         |

Supplementary Material Table S1; G4Hunter results

| <b>Supplementary Material Table S1: Results;</b> (A) the DNA sequence; (B) the NCBI accession numbers for genomic sequences; (C), assigned tags corresponding to the generic name of analyzed organism; (D) count of every nucleotide; (E) the total length of genome; (F) GC count of genome; (G) gc content in %; (H) the total count of PQS found; (I) the PQS frequency per 1,000 nt; (J) the number of PQS per 1,000 GC; (K-O) the the total count of PQS with different G4hunter score 1.2-1.4 interval; (P-T), the total lenght of PQSs with different G4Hunter score interval; (U) the total lenght of all PQS found; (V) total length of PQS divided by genome length ; (W-AA) shows the frequency of PQS with different G4Hunter score interval; (AB-AH) the coverage of the sequence by PQS in different G4Hunter score intervals. For every column with numerical data, there is statistical analyses below results. |        |                  |               |        |                      |                      |                      |
|----------------------------------------------------------------------------------------------------------------------------------------------------------------------------------------------------------------------------------------------------------------------------------------------------------------------------------------------------------------------------------------------------------------------------------------------------------------------------------------------------------------------------------------------------------------------------------------------------------------------------------------------------------------------------------------------------------------------------------------------------------------------------------------------------------------------------------------------------------------------------------------------------------------------------------|--------|------------------|---------------|--------|----------------------|----------------------|----------------------|
| F                                                                                                                                                                                                                                                                                                                                                                                                                                                                                                                                                                                                                                                                                                                                                                                                                                                                                                                                | G      | H                | I             | J      | K                    | L                    | M                    |
| gc_count [bp]                                                                                                                                                                                                                                                                                                                                                                                                                                                                                                                                                                                                                                                                                                                                                                                                                                                                                                                    | gc %   | PQS result_count | PQS frequency | PQS/GC | result_count 1.2-1.4 | result_count 1.4-1.6 | result_count 1.6-1.8 |
| 115620640                                                                                                                                                                                                                                                                                                                                                                                                                                                                                                                                                                                                                                                                                                                                                                                                                                                                                                                        | 31.07  | 160922           | 0.432394064   | 1.39   | 157590               | 2762                 | 349                  |
| 126895987                                                                                                                                                                                                                                                                                                                                                                                                                                                                                                                                                                                                                                                                                                                                                                                                                                                                                                                        | 29.68  | 175744           | 0.411002937   | 1.38   | 172448               | 2789                 | 291                  |
| 130046616                                                                                                                                                                                                                                                                                                                                                                                                                                                                                                                                                                                                                                                                                                                                                                                                                                                                                                                        | 29.72  | 181878           | 0.415663377   | 1.40   | 178551               | 2824                 | 286                  |
| 133439045                                                                                                                                                                                                                                                                                                                                                                                                                                                                                                                                                                                                                                                                                                                                                                                                                                                                                                                        | 29.90  | 184737           | 0.413883096   | 1.38   | 181180               | 2960                 | 363                  |
| 174522635                                                                                                                                                                                                                                                                                                                                                                                                                                                                                                                                                                                                                                                                                                                                                                                                                                                                                                                        | 30.13  | 244737           | 0.42249278    | 1.40   | 240149               | 3847                 | 419                  |
| 143213519                                                                                                                                                                                                                                                                                                                                                                                                                                                                                                                                                                                                                                                                                                                                                                                                                                                                                                                        | 29.81  | 200963           | 0.418309468   | 1.40   | 197072               | 3268                 | 359                  |
| 146799341                                                                                                                                                                                                                                                                                                                                                                                                                                                                                                                                                                                                                                                                                                                                                                                                                                                                                                                        | 29.87  | 205775           | 0.418768768   | 1.40   | 201642               | 3468                 | 408                  |
| 164002                                                                                                                                                                                                                                                                                                                                                                                                                                                                                                                                                                                                                                                                                                                                                                                                                                                                                                                           | 45.07  | 573              | 1.574855089   | 3.49   | 567                  | 6                    | 0                    |
| 42448                                                                                                                                                                                                                                                                                                                                                                                                                                                                                                                                                                                                                                                                                                                                                                                                                                                                                                                            | 34.78  | 65               | 0.53263408    | 1.53   | 64                   | 1                    | 0                    |
| 970744233                                                                                                                                                                                                                                                                                                                                                                                                                                                                                                                                                                                                                                                                                                                                                                                                                                                                                                                        | 290.03 | 1355394.00       | 5.04          | 14.79  | 1329263.00           | 21925.00             | 2475.00              |
| 9                                                                                                                                                                                                                                                                                                                                                                                                                                                                                                                                                                                                                                                                                                                                                                                                                                                                                                                                | 9.00   | 9.00             | 9.00          | 9.00   | 9.00                 | 9.00                 | 9.00                 |
| 107860470                                                                                                                                                                                                                                                                                                                                                                                                                                                                                                                                                                                                                                                                                                                                                                                                                                                                                                                        | 32.23  | 150599.33        | 0.56          | 1.64   | 147695.89            | 2436.11              | 275.00               |
| 42448                                                                                                                                                                                                                                                                                                                                                                                                                                                                                                                                                                                                                                                                                                                                                                                                                                                                                                                            | 29.68  | 65.00            | 0.41          | 1.38   | 64.00                | 1.00                 | 0.00                 |
| 174522635                                                                                                                                                                                                                                                                                                                                                                                                                                                                                                                                                                                                                                                                                                                                                                                                                                                                                                                        | 45.07  | 244737.00        | 1.57          | 3.49   | 240149.00            | 3847.00              | 419.00               |
| 3555803644195100                                                                                                                                                                                                                                                                                                                                                                                                                                                                                                                                                                                                                                                                                                                                                                                                                                                                                                                 | 22.99  | 6943754065.11    | 0.13          | 0.43   | 6680181065.21        | 1804255.43           | 23369.78             |
| 63247760                                                                                                                                                                                                                                                                                                                                                                                                                                                                                                                                                                                                                                                                                                                                                                                                                                                                                                                         | 5.09   | 88383.95         | 0.38          | 0.70   | 86690.27             | 1424.71              | 162.14               |
| 115620640                                                                                                                                                                                                                                                                                                                                                                                                                                                                                                                                                                                                                                                                                                                                                                                                                                                                                                                        | 29.81  | 160922.00        | 0.42          | 1.39   | 157590.00            | 2762.00              | 286.00               |
| 130046616                                                                                                                                                                                                                                                                                                                                                                                                                                                                                                                                                                                                                                                                                                                                                                                                                                                                                                                        | 29.90  | 181878.00        | 0.42          | 1.40   | 178551.00            | 2824.00              | 349.00               |
| 143213519                                                                                                                                                                                                                                                                                                                                                                                                                                                                                                                                                                                                                                                                                                                                                                                                                                                                                                                        | 31.07  | 200963.00        | 0.43          | 1.40   | 197072.00            | 3268.00              | 363.00               |

Supplementary Material Table S1; G4Hunter results

| <b>Supplementary Material Table S1: Results;</b> (A) the DNA sequence; (B) the NCBI accession numbers for genomic sequences; (C), assigned tags corresponding to and the generic name of analyzed organism; (D) count of every nucleotide; (E) the total length of genome; (F) GC count of genome; (G) gc content in %; (H) the total count of PQS found; (I) the PQS frequency per 1,000 nt; (J) the number of PQS per 1,000 GC; (K-O) the the total count of PQS with different G4hunter score 1.2-1.4 interval; (P-T), the total lenght of PQSs with different G4Hunter score interval; (U) the total lenght of all PQS found; (V) total length of PQS divided by genome length ; (W-AA) shows the frequency of PQS with different G4Hunter score interval; (AB-AH) the coverage of the sequence by PQS in different G4Hunter score intervals. For every column with numerical data, there is statistical analyses below results. |                           |                |                |                |                |                     |            |
|--------------------------------------------------------------------------------------------------------------------------------------------------------------------------------------------------------------------------------------------------------------------------------------------------------------------------------------------------------------------------------------------------------------------------------------------------------------------------------------------------------------------------------------------------------------------------------------------------------------------------------------------------------------------------------------------------------------------------------------------------------------------------------------------------------------------------------------------------------------------------------------------------------------------------------------|---------------------------|----------------|----------------|----------------|----------------|---------------------|------------|
| N                                                                                                                                                                                                                                                                                                                                                                                                                                                                                                                                                                                                                                                                                                                                                                                                                                                                                                                                    | O                         | P              | Q              | R              | S              | T                   | U          |
| result_count 1.8-2.0                                                                                                                                                                                                                                                                                                                                                                                                                                                                                                                                                                                                                                                                                                                                                                                                                                                                                                                 | result_count 2.0 and more | lenght 1.2-1,4 | lenght 1.4-1.6 | lenght 1.6-1.8 | lenght 1.8-2.0 | lenght 2.0 and more | lenght all |
| 105                                                                                                                                                                                                                                                                                                                                                                                                                                                                                                                                                                                                                                                                                                                                                                                                                                                                                                                                  | 116                       | 4741532        | 102120         | 22055          | 8054           | 15507               | 4889268    |
| 97                                                                                                                                                                                                                                                                                                                                                                                                                                                                                                                                                                                                                                                                                                                                                                                                                                                                                                                                   | 119                       | 5165179        | 99780          | 18598          | 8102           | 13250               | 5304909    |
| 94                                                                                                                                                                                                                                                                                                                                                                                                                                                                                                                                                                                                                                                                                                                                                                                                                                                                                                                                   | 123                       | 5356445        | 99312          | 16675          | 7240           | 15729               | 5495401    |
| 110                                                                                                                                                                                                                                                                                                                                                                                                                                                                                                                                                                                                                                                                                                                                                                                                                                                                                                                                  | 124                       | 5442049        | 105379         | 23661          | 8687           | 19565               | 5599341    |
| 157                                                                                                                                                                                                                                                                                                                                                                                                                                                                                                                                                                                                                                                                                                                                                                                                                                                                                                                                  | 165                       | 7221541        | 139542         | 24433          | 11823          | 18890               | 7416229    |
| 136                                                                                                                                                                                                                                                                                                                                                                                                                                                                                                                                                                                                                                                                                                                                                                                                                                                                                                                                  | 128                       | 5922792        | 119488         | 21770          | 10162          | 15814               | 6090026    |
| 113                                                                                                                                                                                                                                                                                                                                                                                                                                                                                                                                                                                                                                                                                                                                                                                                                                                                                                                                  | 144                       | 6057336        | 126339         | 25974          | 9032           | 19458               | 6238139    |
| 0                                                                                                                                                                                                                                                                                                                                                                                                                                                                                                                                                                                                                                                                                                                                                                                                                                                                                                                                    | 0                         | 17314          | 181            | 0              | 0              | 0                   | 17495      |
| 0                                                                                                                                                                                                                                                                                                                                                                                                                                                                                                                                                                                                                                                                                                                                                                                                                                                                                                                                    | 0                         | 1988           | 31             | 0              | 0              | 0                   | 2019       |

  

|         |         |                  |               |             |             |             |                  |
|---------|---------|------------------|---------------|-------------|-------------|-------------|------------------|
| 812.00  | 919.00  | 39926176.00      | 792172.00     | 153166.00   | 63100.00    | 118213.00   | 41052827.00      |
| 9.00    | 9.00    | 9.00             | 9.00          | 9.00        | 9.00        | 9.00        | 9.00             |
| 90.22   | 102.11  | 4436241.78       | 88019.11      | 17018.44    | 7011.11     | 13134.78    | 4561425.22       |
| 0.00    | 0.00    | 1988.00          | 31.00         | 0.00        | 0.00        | 0.00        | 2019.00          |
| 157.00  | 165.00  | 7221541.00       | 139542.00     | 25974.00    | 11823.00    | 19565.00    | 7416229.00       |
| 2669.28 | 3180.77 | 6029796977884.84 | 2370755894.32 | 89901464.25 | 15624041.65 | 53227465.51 | 6371467770409.51 |
| 54.80   | 59.82   | 2604519.46       | 51643.98      | 10056.80    | 4192.50     | 7738.27     | 2677293.64       |
| 94.00   | 116.00  | 4741532.00       | 99312.00      | 16675.00    | 7240.00     | 13250.00    | 4889268.00       |
| 105.00  | 123.00  | 5356445.00       | 102120.00     | 21770.00    | 8102.00     | 15729.00    | 5495401.00       |
| 113.00  | 128.00  | 5922792.00       | 119488.00     | 23661.00    | 9032.00     | 18890.00    | 6090026.00       |

Supplementary Material Table S1; G4Hunter results

| <b>Supplementary Material Table S1: Results;</b> (A) the DNA sequence; (B) the NCBI accession numbers for genomic sequences; (C), assigned tags corresponding to and the generic name of analyzed organism; (D) count of every nucleotide; (E) the total length of genome; (F) GC count of genome; (G) gc content in %; (H) the total count of PQS found; (I) the PQS frequency per 1,000 nt; (J) the number of PQS per 1,000 GC; (K-O) the the total count of PQS with different G4hunter score 1.2-1.4 interval; (P-T), the total lenght of PQSs with different G4Hunter score interval; (U) the total lenght of all PQS found; (V) total length of PQS divided by genome length ; (W-AA) shows the frequency of PQS with different G4Hunter score interval; (AB-AH) the coverage of the sequence by PQS in different G4Hunter score intervals. For every column with numerical data, there is statistical analyses below results. |                   |                   |                   |                   |                        |
|--------------------------------------------------------------------------------------------------------------------------------------------------------------------------------------------------------------------------------------------------------------------------------------------------------------------------------------------------------------------------------------------------------------------------------------------------------------------------------------------------------------------------------------------------------------------------------------------------------------------------------------------------------------------------------------------------------------------------------------------------------------------------------------------------------------------------------------------------------------------------------------------------------------------------------------|-------------------|-------------------|-------------------|-------------------|------------------------|
| V                                                                                                                                                                                                                                                                                                                                                                                                                                                                                                                                                                                                                                                                                                                                                                                                                                                                                                                                    | W                 | X                 | Y                 | Z                 | AA                     |
| lenght %                                                                                                                                                                                                                                                                                                                                                                                                                                                                                                                                                                                                                                                                                                                                                                                                                                                                                                                             | frequency 1.2-1.4 | frequency 1.4-1.6 | frequency 1.6-1.8 | frequency 1.8-2.0 | frequency 2.0 and more |
| 1.31                                                                                                                                                                                                                                                                                                                                                                                                                                                                                                                                                                                                                                                                                                                                                                                                                                                                                                                                 | 0.42344           | 0.00742           | 0.00094           | 0.00028           | 0.00031                |
| 1.24                                                                                                                                                                                                                                                                                                                                                                                                                                                                                                                                                                                                                                                                                                                                                                                                                                                                                                                                 | 0.40329           | 0.00652           | 0.00068           | 0.00023           | 0.00028                |
| 1.26                                                                                                                                                                                                                                                                                                                                                                                                                                                                                                                                                                                                                                                                                                                                                                                                                                                                                                                                 | 0.40806           | 0.00645           | 0.00065           | 0.00021           | 0.00028                |
| 1.25                                                                                                                                                                                                                                                                                                                                                                                                                                                                                                                                                                                                                                                                                                                                                                                                                                                                                                                                 | 0.40591           | 0.00663           | 0.00081           | 0.00025           | 0.00028                |
| 1.28                                                                                                                                                                                                                                                                                                                                                                                                                                                                                                                                                                                                                                                                                                                                                                                                                                                                                                                                 | 0.41457           | 0.00664           | 0.00072           | 0.00027           | 0.00028                |
| 1.27                                                                                                                                                                                                                                                                                                                                                                                                                                                                                                                                                                                                                                                                                                                                                                                                                                                                                                                                 | 0.41021           | 0.00680           | 0.00075           | 0.00028           | 0.00027                |
| 1.27                                                                                                                                                                                                                                                                                                                                                                                                                                                                                                                                                                                                                                                                                                                                                                                                                                                                                                                                 | 0.41036           | 0.00706           | 0.00083           | 0.00023           | 0.00029                |
| 4.81                                                                                                                                                                                                                                                                                                                                                                                                                                                                                                                                                                                                                                                                                                                                                                                                                                                                                                                                 | 1.55836           | 0.01649           | 0.00000           | 0.00000           | 0.00000                |
| 1.65                                                                                                                                                                                                                                                                                                                                                                                                                                                                                                                                                                                                                                                                                                                                                                                                                                                                                                                                 | 0.52444           | 0.00819           | 0.00000           | 0.00000           | 0.00000                |
| 15.35                                                                                                                                                                                                                                                                                                                                                                                                                                                                                                                                                                                                                                                                                                                                                                                                                                                                                                                                | 4.958654          | 0.072216          | 0.005386          | 0.001754          | 0.001993               |
| 9.00                                                                                                                                                                                                                                                                                                                                                                                                                                                                                                                                                                                                                                                                                                                                                                                                                                                                                                                                 | 9.000000          | 9.000000          | 9.000000          | 9.000000          | 9.000000               |
| 1.71                                                                                                                                                                                                                                                                                                                                                                                                                                                                                                                                                                                                                                                                                                                                                                                                                                                                                                                                 | 0.550962          | 0.008024          | 0.000598          | 0.000195          | 0.000221               |
| 1.24                                                                                                                                                                                                                                                                                                                                                                                                                                                                                                                                                                                                                                                                                                                                                                                                                                                                                                                                 | 0.403295          | 0.006454          | 0.000000          | 0.000000          | 0.000000               |
| 4.81                                                                                                                                                                                                                                                                                                                                                                                                                                                                                                                                                                                                                                                                                                                                                                                                                                                                                                                                 | 1.558364          | 0.016491          | 0.000938          | 0.000283          | 0.000312               |
| 1.22                                                                                                                                                                                                                                                                                                                                                                                                                                                                                                                                                                                                                                                                                                                                                                                                                                                                                                                                 | 0.128141          | 0.000009          | 0.000000          | 0.000000          | 0.000000               |
| 1.17                                                                                                                                                                                                                                                                                                                                                                                                                                                                                                                                                                                                                                                                                                                                                                                                                                                                                                                                 | 0.379683          | 0.003222          | 0.000350          | 0.000113          | 0.000126               |
| 1.26                                                                                                                                                                                                                                                                                                                                                                                                                                                                                                                                                                                                                                                                                                                                                                                                                                                                                                                                 | 0.408060          | 0.006632          | 0.000654          | 0.000215          | 0.000266               |
| 1.27                                                                                                                                                                                                                                                                                                                                                                                                                                                                                                                                                                                                                                                                                                                                                                                                                                                                                                                                 | 0.410358          | 0.006802          | 0.000723          | 0.000230          | 0.000278               |
| 1.31                                                                                                                                                                                                                                                                                                                                                                                                                                                                                                                                                                                                                                                                                                                                                                                                                                                                                                                                 | 0.423441          | 0.007421          | 0.000813          | 0.000271          | 0.000285               |

Supplementary Material Table S1; G4Hunter results

| <p>Supplementary Material Table S1: Results; (A) the DNA sequence; (B) the NCBI accession numbers for genomic sequences; (C), assigned tags corresponding to and the generic name of analyzed organism; (D) count of every nucleotide; (E) the total length of genome; (F) GC count of genome; (G) gc content in %; (H) the total count of PQS found; (I) the PQS frequency per 1,000 nt; (J) the number of PQS per 1,000 GC; (K-O) the the total count of PQS with different G4hunter score 1.2-1.4 interval; (P-T), the total lenght of PQSs with different G4Hunter score interval; (U) the total lenght of all PQS found; (V) total length of PQS divided by genome length ; (W-AA) shows the frequency of PQS with different G4Hunter score interval; (AB-AH) the coverage of the sequence by PQS in different G4Hunter score intervals. For every column with numerical data, there is statistical analyses below results.</p> |                       |                       |                       |                            |                   |                  |
|--------------------------------------------------------------------------------------------------------------------------------------------------------------------------------------------------------------------------------------------------------------------------------------------------------------------------------------------------------------------------------------------------------------------------------------------------------------------------------------------------------------------------------------------------------------------------------------------------------------------------------------------------------------------------------------------------------------------------------------------------------------------------------------------------------------------------------------------------------------------------------------------------------------------------------------|-----------------------|-----------------------|-----------------------|----------------------------|-------------------|------------------|
| AB                                                                                                                                                                                                                                                                                                                                                                                                                                                                                                                                                                                                                                                                                                                                                                                                                                                                                                                                   | AC                    | AD                    | AE                    | AF                         | AG                | AH               |
| Coverage [nt] 1.2-1.4                                                                                                                                                                                                                                                                                                                                                                                                                                                                                                                                                                                                                                                                                                                                                                                                                                                                                                                | Coverage [nt] 1.4-1.6 | Coverage [nt] 1.6-1.8 | Coverage [nt] 1.8-2.0 | Coverage [nt] 2.0 and more | Coverage [nt] all | Coverage all [%] |
| 4058970                                                                                                                                                                                                                                                                                                                                                                                                                                                                                                                                                                                                                                                                                                                                                                                                                                                                                                                              | 101513                | 21978                 | 8262                  | 15434                      | 4170855           | 1.121            |
| 4437919                                                                                                                                                                                                                                                                                                                                                                                                                                                                                                                                                                                                                                                                                                                                                                                                                                                                                                                              | 99223                 | 18520                 | 8220                  | 13250                      | 4540973           | 1.062            |
| 4598392                                                                                                                                                                                                                                                                                                                                                                                                                                                                                                                                                                                                                                                                                                                                                                                                                                                                                                                              | 98874                 | 16623                 | 7498                  | 15729                      | 4701598           | 1.075            |
| 4676201                                                                                                                                                                                                                                                                                                                                                                                                                                                                                                                                                                                                                                                                                                                                                                                                                                                                                                                              | 104935                | 23578                 | 8687                  | 19542                      | 4796576           | 1.075            |
| 6193091                                                                                                                                                                                                                                                                                                                                                                                                                                                                                                                                                                                                                                                                                                                                                                                                                                                                                                                              | 138979                | 24387                 | 12042                 | 18843                      | 6339760           | 1.094            |
| 5086405                                                                                                                                                                                                                                                                                                                                                                                                                                                                                                                                                                                                                                                                                                                                                                                                                                                                                                                              | 118871                | 21770                 | 10620                 | 15734                      | 5211974           | 1.085            |
| 5194160                                                                                                                                                                                                                                                                                                                                                                                                                                                                                                                                                                                                                                                                                                                                                                                                                                                                                                                              | 125561                | 25854                 | 9234                  | 19382                      | 5329415           | 1.085            |
| 14243                                                                                                                                                                                                                                                                                                                                                                                                                                                                                                                                                                                                                                                                                                                                                                                                                                                                                                                                | 181                   | 0                     | 0                     | 0                          | 14396             | 3.957            |
| 1805                                                                                                                                                                                                                                                                                                                                                                                                                                                                                                                                                                                                                                                                                                                                                                                                                                                                                                                                 | 31                    | 0                     | 0                     | 0                          | 1820              | 1.491            |
| 34261186.00                                                                                                                                                                                                                                                                                                                                                                                                                                                                                                                                                                                                                                                                                                                                                                                                                                                                                                                          | 788168.00             | 152710.00             | 64563.00              | 117914.00                  | 35107367.00       | 13.04            |
| 9.00                                                                                                                                                                                                                                                                                                                                                                                                                                                                                                                                                                                                                                                                                                                                                                                                                                                                                                                                 | 9.00                  | 9.00                  | 9.00                  | 9.00                       | 9.00              | 9.00             |
| 3806798.44                                                                                                                                                                                                                                                                                                                                                                                                                                                                                                                                                                                                                                                                                                                                                                                                                                                                                                                           | 87574.22              | 16967.78              | 7173.67               | 13101.56                   | 3900818.56        | 1.45             |
| 1805.00                                                                                                                                                                                                                                                                                                                                                                                                                                                                                                                                                                                                                                                                                                                                                                                                                                                                                                                              | 31.00                 | 0.00                  | 0.00                  | 0.00                       | 1820.00           | 1.06             |
| 6193091.00                                                                                                                                                                                                                                                                                                                                                                                                                                                                                                                                                                                                                                                                                                                                                                                                                                                                                                                           | 138979.00             | 25854.00              | 12042.00              | 19542.00                   | 6339760.00        | 3.96             |
| 4440265989431.58                                                                                                                                                                                                                                                                                                                                                                                                                                                                                                                                                                                                                                                                                                                                                                                                                                                                                                                     | 2347265660.40         | 89356415.28           | 16380055.11           | 52942729.80                | 4660140922061.36  | 0.80             |
| 2235016.61                                                                                                                                                                                                                                                                                                                                                                                                                                                                                                                                                                                                                                                                                                                                                                                                                                                                                                                           | 51387.49              | 10026.26              | 4292.73               | 7717.55                    | 2289685.25        | 0.95             |
| 4058970.00                                                                                                                                                                                                                                                                                                                                                                                                                                                                                                                                                                                                                                                                                                                                                                                                                                                                                                                           | 98874.00              | 16623.00              | 7498.00               | 13250.00                   | 4170855.00        | 1.07             |
| 4598392.00                                                                                                                                                                                                                                                                                                                                                                                                                                                                                                                                                                                                                                                                                                                                                                                                                                                                                                                           | 101513.00             | 21770.00              | 8262.00               | 15729.00                   | 4701598.00        | 1.08             |
| 5086405.00                                                                                                                                                                                                                                                                                                                                                                                                                                                                                                                                                                                                                                                                                                                                                                                                                                                                                                                           | 118871.00             | 23578.00              | 9234.00               | 18843.00                   | 5211974.00        | 1.12             |

Supplementary Material Table S2; Annotation results

| Nuclear DNA |                 |            |          |           |                          |            |        |           |                             |            |        |           |
|-------------|-----------------|------------|----------|-----------|--------------------------|------------|--------|-----------|-----------------------------|------------|--------|-----------|
|             | PQS count       | All before | All in   | All after | PQS frequency per 1000bp | All before | All in | All after | PQS frequency ratio to gene | All before | All in | All after |
| Feature     | CDS             | 7222       | 40539    | 6969      |                          | 0.308      | 0.785  | 0.297     |                             | 0.589      | 1.341  | 0.558     |
|             | exon            | 7192       | 53823    | 6942      |                          | 0.287      | 0.656  | 0.277     |                             | 0.549      | 1.120  | 0.520     |
|             | five_prime_UTR  | 2633       | 7898     | 2541      |                          | 0.685      | 0.675  | 0.661     |                             | 1.310      | 1.154  | 1.241     |
|             | gene            | 2002       | 64115    | 2040      |                          | 0.523      | 0.585  | 0.532     |                             | 1.000      | 1.000  | 1.000     |
|             | mRNA            | 2478       | 89501    | 2484      |                          | 0.494      | 0.534  | 0.495     |                             | 0.946      | 0.912  | 0.930     |
|             | ncRNA           | 6          | 22       | 4         |                          | 0.469      | 0.689  | 0.313     |                             | 0.897      | 1.177  | 0.587     |
|             | repeat_regions  | 10310738   | 15682488 | 10297699  |                          | 0.581      | 0.545  | 0.580     |                             | 1.111      | 0.930  | 1.089     |
|             | three_prime_UTR | 1173       | 5387     | 1163      |                          | 0.317      | 0.287  | 0.315     |                             | 0.607      | 0.490  | 0.591     |

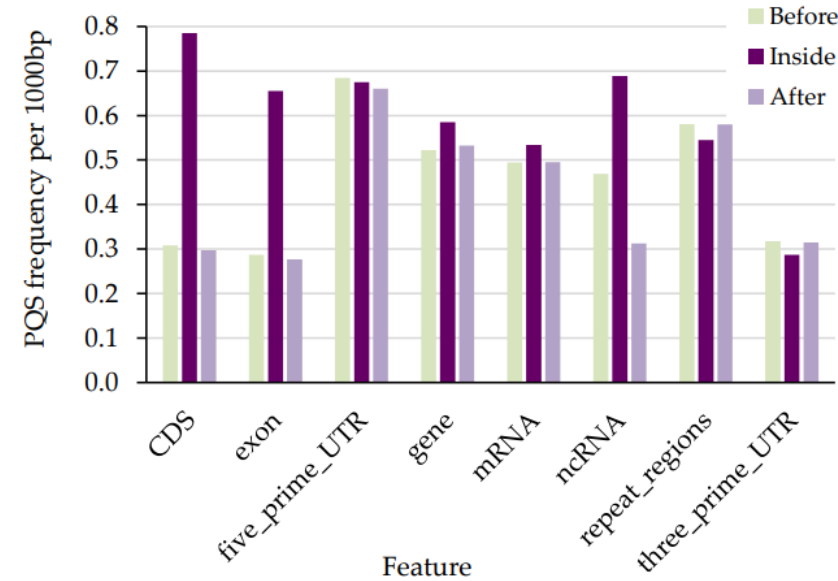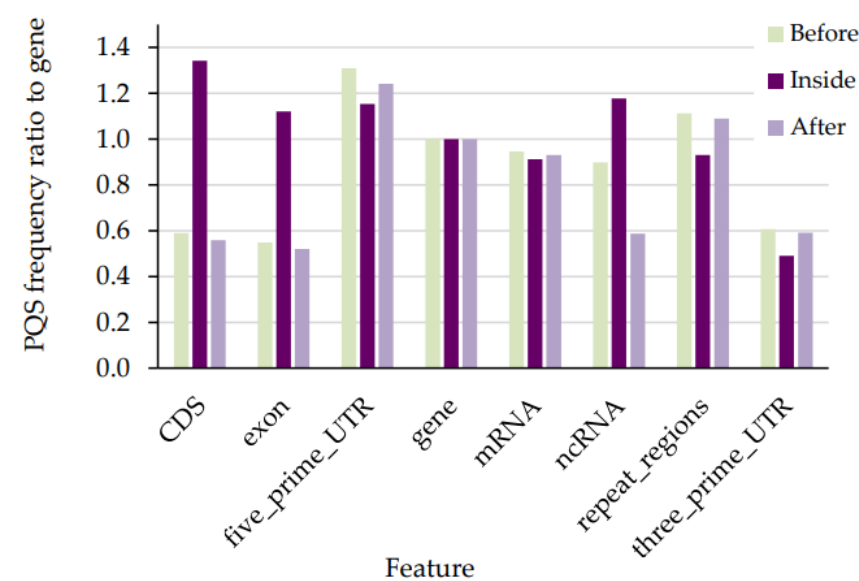

Supplementary Material Table S2; Annotation results

| Mitochondrial DNA |      |            |        |           |                          |            |        |           |                             |            |        |           |
|-------------------|------|------------|--------|-----------|--------------------------|------------|--------|-----------|-----------------------------|------------|--------|-----------|
| PQS count         |      | All before | All in | All after | PQS frequency per 1000bp | All before | All in | All after | PQS frequency ratio to gene | All before | All in | All after |
| Feature           | gene | 20         | 115    | 19        |                          | 3.125      | 2.159  | 2.969     |                             | 1.000      | 1.000  | 1.000     |
|                   | tRNA | 8          | 2      | 4         |                          | 4.444      | 1.576  | 2.222     |                             | 1.422      | 0.730  | 0.749     |
|                   | CDS  | 10         | 42     | 20        |                          | 1.852      | 1.408  | 3.704     |                             | 0.593      | 0.652  | 1.248     |
|                   | exon | 5          | 12     | 15        |                          | 1.563      | 1.130  | 4.688     |                             | 0.500      | 0.524  | 1.579     |
|                   | rRNA | 3          | 13     | 1         |                          | 10.000     | 2.575  | 3.333     |                             | 3.200      | 1.193  | 1.123     |

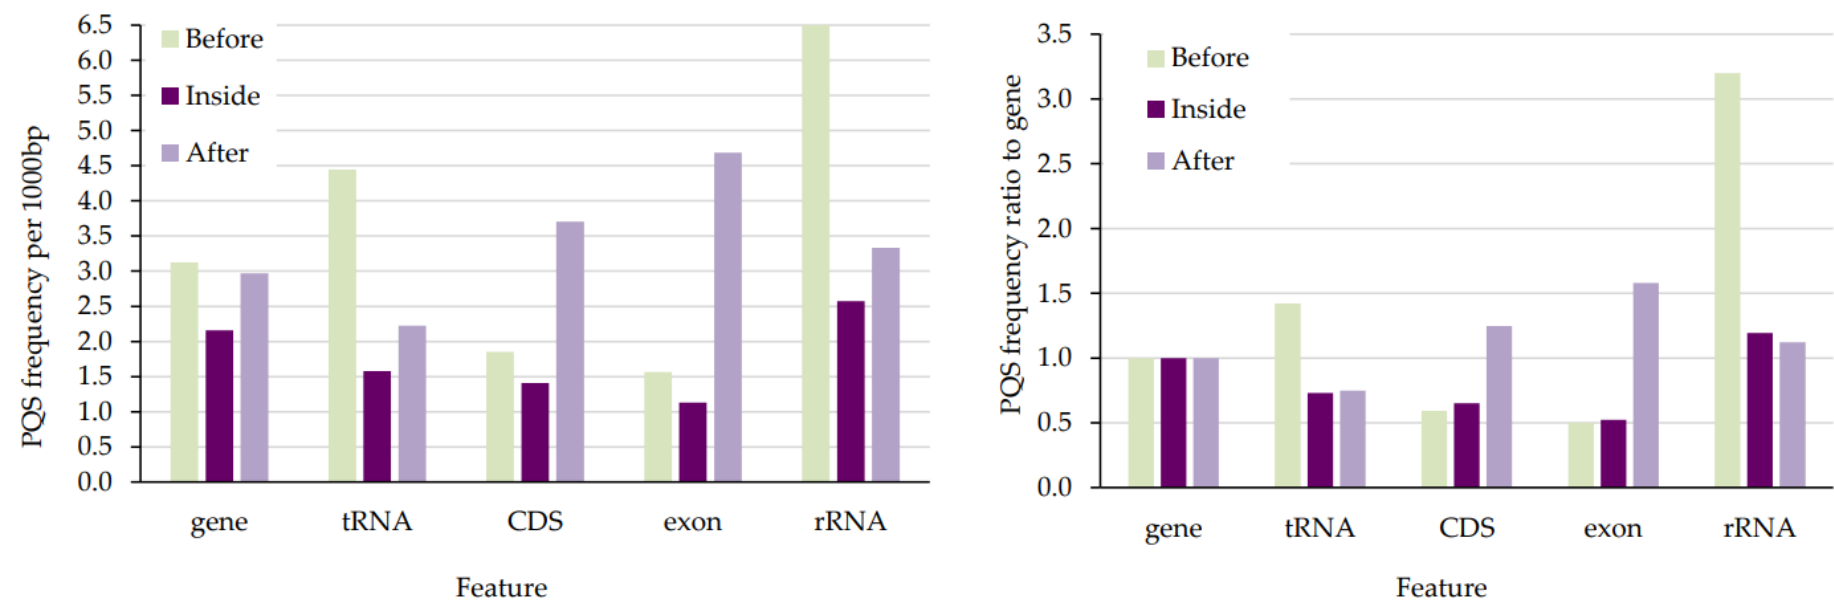

Supplementary Material Table S2; Annotation results

| Chloroplast DNA |      |            |        |           |                          |            |        |           |                             |            |        |           |
|-----------------|------|------------|--------|-----------|--------------------------|------------|--------|-----------|-----------------------------|------------|--------|-----------|
| PQS count       |      | All before | All in | All after | PQS frequency per 1000bp | All before | All in | All after | PQS frequency ratio to gene | All before | All in | All after |
| Feature         | gene | 9          | 44     | 9         |                          | 0.826      | 0.511  | 0.826     |                             | 1.000      | 1.000  | 1.000     |
|                 | tRNA | 4          | 1      | 6         |                          | 1.176      | 0.454  | 1.765     |                             | 1.425      | 0.888  | 2.137     |
|                 | CDS  | 3          | 34     | 3         |                          | 0.349      | 0.521  | 0.349     |                             | 0.422      | 1.020  | 0.422     |
|                 | exon | 1          | 7      | 3         |                          | 0.303      | 0.743  | 0.909     |                             | 0.367      | 1.454  | 1.101     |
|                 | rRNA | 2          | 5      | 1         |                          | 5.000      | 1.105  | 2.500     |                             | 6.056      | 2.162  | 3.028     |

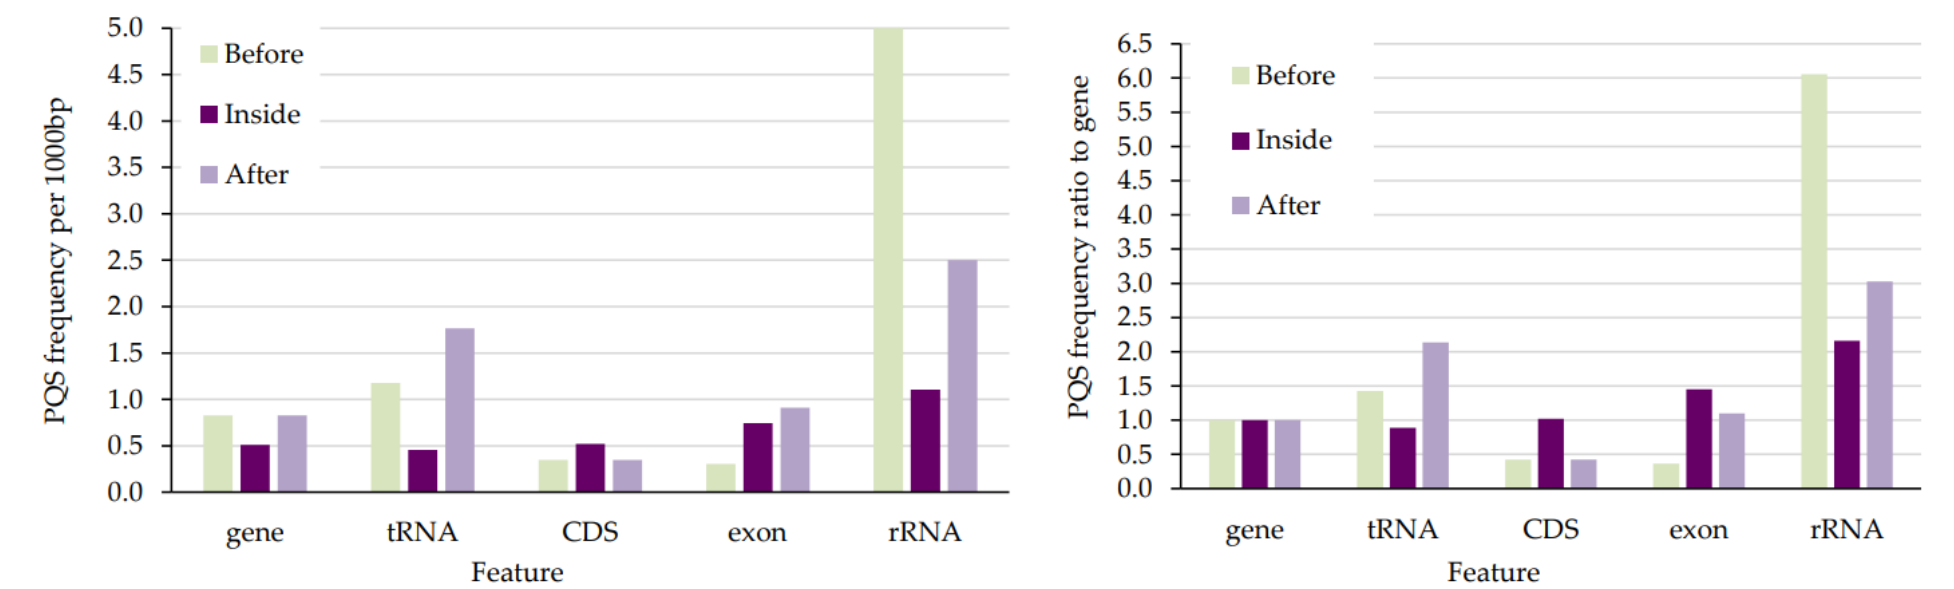



Supplementary Material Table S3; Total number of PQS found on sense and antisense DNA strand

Supplementary Table S1. Total number of PQS found on sense and antisense DNA strand - summarized (A), nuclear DNA (B), mtDNA (C) and cpDNA (D)

|                              |                                  |
|------------------------------|----------------------------------|
| A                            |                                  |
| Number of PQS (sense strand) | Number of PQS (antisense strand) |
| 679713                       | 675681                           |
| B                            |                                  |
| Number of PQS (sense strand) | Number of PQS (antisense strand) |
| 679400                       | 675356                           |
| C                            |                                  |
| Number of PQS (sense strand) | Number of PQS (antisense strand) |
| 289                          | 284                              |
| D                            |                                  |
| Number of PQS (sense strand) | Number of PQS (antisense strand) |
| 24                           | 41                               |

Supplementary Material Table S4; Transposable elements annotation

| Transposable elements |                |            |          |           |                          |            |        |           |                             |            |        |           |
|-----------------------|----------------|------------|----------|-----------|--------------------------|------------|--------|-----------|-----------------------------|------------|--------|-----------|
|                       | PQS count      | All before | All in   | All after | PQS frequency per 1000bp | All before | All in | All after | PQS frequency ratio to gene | All before | All in | All after |
| Feature               | Helitron       | 148        | 254      | 122       |                          | 0.264      | 0.185  | 0.217     |                             | 0.504      | 0.316  | 0.408     |
|                       | LTR            | 20400      | 25936    | 20354     |                          | 0.790      | 0.615  | 0.788     |                             | 1.512      | 1.050  | 1.480     |
|                       | pararetrovirus | 0          | 0        | 2         |                          | 0.000      | 0.000  | 0.114     |                             | 0.000      | 0.000  | 0.213     |
|                       | plastid        | 193        | 409      | 233       |                          | 0.691      | 0.400  | 0.834     |                             | 1.321      | 0.684  | 1.566     |
|                       | rDNA           | 92         | 242      | 122       |                          | 0.459      | 0.470  | 0.609     |                             | 0.879      | 0.803  | 1.144     |
|                       | repeat         | 83         | 92       | 77        |                          | 0.029      | 0.013  | 0.026     |                             | 0.055      | 0.022  | 0.050     |
|                       | satellite      | 6684       | 3166     | 7140      |                          | 0.070      | 0.017  | 0.075     |                             | 0.134      | 0.030  | 0.141     |
|                       | TIR            | 64136      | 126740   | 64352     |                          | 0.856      | 0.878  | 0.859     |                             | 1.638      | 1.500  | 1.613     |
|                       | Ty1/copia      | 443208     | 737370   | 442748    |                          | 0.307      | 0.308  | 0.307     |                             | 0.588      | 0.527  | 0.576     |
|                       | Ty3/gypsy      | 9629685    | 14551992 | 9616201   |                          | 0.610      | 0.568  | 0.609     |                             | 1.167      | 0.971  | 1.144     |
|                       | unknown        | 146109     | 236287   | 146348    |                          | 0.457      | 0.557  | 0.458     |                             | 0.874      | 0.951  | 0.859     |
|                       | gene           | 2002       | 64115    | 2040      |                          | 0.523      | 0.585  | 0.532     |                             | 1.000      | 1.000  | 1.000     |

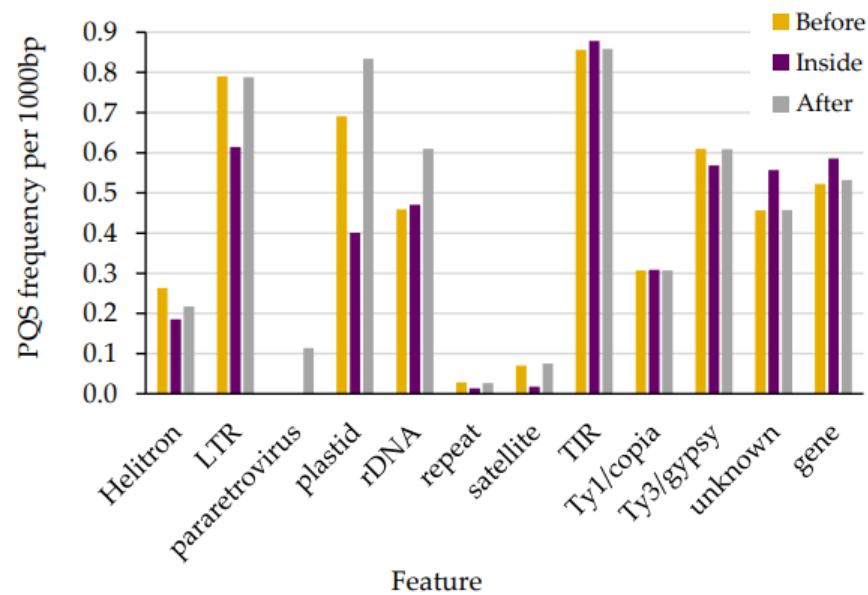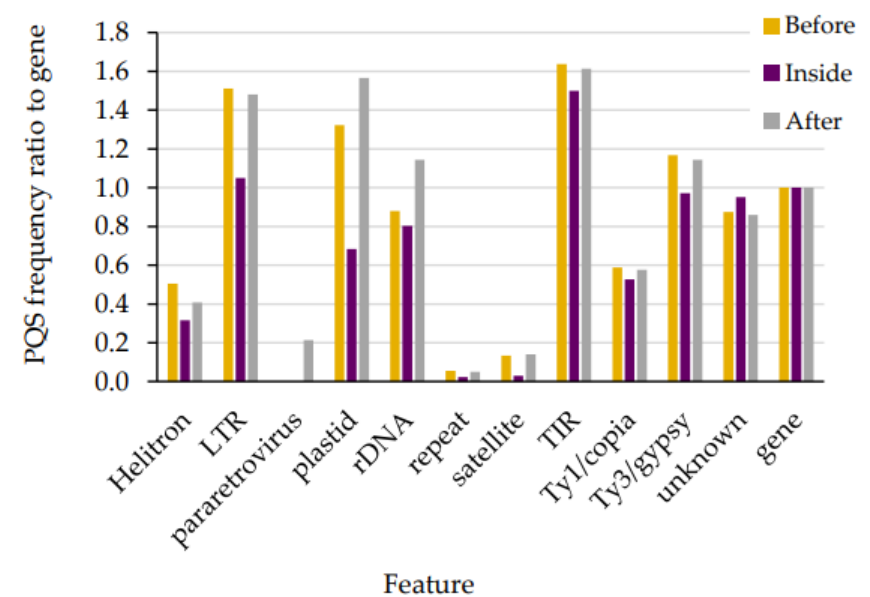

Supplement: s1 [file s1]
